# Supplementary material
Source: Springer Nature journal article supplement (https://www.springermedizin.de/resource/supplementary/13012_2013_729_MOESM8_ESM.pdf/9630546)
Supplement: MOESM8 [file 9630546]

Base population 19,537

Excluded 1,996 (patients who were listed in occupational healthcare)

Randomized 17,541

Excluded 3,953 (patient record not accessed during the study)

Randomized to intervention group

6,830

Followed for 3 months

6,435

Followed for 6 months

5,983

**Followed for 12 months**

**3,836**

Randomized to control group

6,758

Followed for 3 months

6,360

Followed for 6 months

5,928

**Followed for 12 months**

**3,836**
